1                    **Tissue-specific volatile-mediated defense regulation in maize leaves and roots**

2    Cong van Doan<sup>1,2</sup>, Tobias Züst<sup>1</sup>, Corina Maurer<sup>1</sup>, Xi Zhang<sup>1,3</sup>, Ricardo A.R. Machado<sup>1</sup>, Pierre Mateo<sup>1</sup>,  
3                    Meng Ye<sup>1</sup>, Bernardus C.J. Schimmel<sup>1</sup>, Gaétan Glauser<sup>4</sup>, Christelle A.M. Robert<sup>1,2\*</sup>

4

5    <sup>1</sup> Institute of Plant Sciences, University of Bern, Bern, Switzerland

6    <sup>2</sup> Oeschger Centre for Climate Change Research (OCCR), University of Bern, Bern, Switzerland

7    <sup>3</sup> Key Laboratory of Plant Stress Biology, State Key Laboratory of Cotton Biology, School of Life  
8    Sciences, Henan University, Kaifeng 475004, China.

9    <sup>4</sup> Neuchâtel Platform of Analytical Chemistry, Université de Neuchâtel, Neuchâtel, Switzerland

10

11    \* For correspondence:

12    Christelle Robert

13    Tel: +41 31 631 31 55

14    Email: [christelle.robert@ips.unibe.ch](mailto:christelle.robert@ips.unibe.ch)

15

16    Word count: Total: 3'968, Introduction: 623, Materials and Methods: 1'520, Results: 681, Discussion:  
17    1144.

18    Number of figures: 5 (incl. 5 to be published in colour)

19    Number of tables: 0 table

20    Supporting information: 2 figures, 1 table

21 **SUMMARY**

- 22 • Plant leaves that are exposed to herbivore induced plant volatiles (HIPVs) respond by increasing  
23 their defenses. Whether this phenomenon also occurs in the roots is unknown.
- 24 • Using maize (*Zea mays*), whose leaves respond strongly to leaf HIPVs, we measured the impact  
25 of root HIPVs, emanating from plants infested by the banded cucumber beetle (*Diabrotica*  
26 *balteata*), on constitutive and herbivore-induced levels of root soluble sugars, starch, total  
27 soluble proteins, free amino acids, volatile and non-volatile secondary metabolites, defense gene  
28 expression, growth and root herbivore resistance of neighboring plants.
- 29 • HIPV exposure did not alter constitutive or induced levels of any of the measured root traits.  
30 Furthermore, HIPV exposure did not reduce the performance and survival of banded cucumber  
31 beetle larvae on maize or teosinte. Cross-exposure experiments revealed that maize roots, in  
32 contrast to maize leaves, neither emit nor respond strongly to defense-regulating HIPVs.
- 33 • Together, these results demonstrate that volatile-mediated defense regulation is restricted to the  
34 leaves of maize and teosinte, a finding which is in line with the lower diffusibility of volatiles  
35 in the soil and the availability of other, potentially more efficient information conduits below  
36 ground.

37

38 **Keywords:** belowground plant-herbivore interactions, maize, plant-plant interactions, priming,  
39 volatiles.

## 40 INTRODUCTION

41 Upon herbivory, plants emit volatile organic compounds that can repel herbivores and attract their  
42 natural enemies (Baldwin, 2010; Turlings & Erb, 2018). These herbivore-induced plant volatiles  
43 (HIPVs) can also be perceived by unattacked plant tissues and neighboring plants, resulting in the direct  
44 activation and/or priming of defense and resistance (Farmer, 2001; Baldwin *et al.*, 2006; Frost *et al.*,  
45 2008; Heil & Ton, 2008; Heil, 2014; Erb, 2018; Turlings & Erb, 2018; Bouwmeester *et al.*, 2019).  
46 Numerous HIPVs have been found to regulate defenses, including green leaf volatiles such as (Z)-3-  
47 hexenal, (Z)-3-hexen-1-ol, and (Z)-3-hexenyl acetate (HAC), aromatic compounds such as indole, and  
48 terpenoids such as ocimene (Farmer, 2001; Engelberth *et al.*, 2004; Erb *et al.*, 2015; Riedlmeier *et al.*,  
49 2017; Ameye *et al.*, 2018). HIPVs can regulate redox signalling genes (González-Bosch, 2018), early  
50 defense signalling genes and proteins such as MAP kinases (Ton *et al.*, 2007; Erb *et al.*, 2015; Hu *et al.*,  
51 2019; Ye *et al.*, 2019), the biosynthesis of stress hormones such as jasmonates (Ton *et al.*, 2007; Heil &  
52 Ton, 2008; Hirao *et al.*, 2012) and the expression of direct and indirect defenses (Zeringue, 1987;  
53 Zeringue, 1992; Bate & Rothstein, 1998; Arimura *et al.*, 2000; Arimura *et al.*, 2001; Engelberth *et al.*,  
54 2004; Farag *et al.*, 2005; Kessler *et al.*, 2006; Kost & Heil, 2006; Ton *et al.*, 2006; Karban, 2011; Kim  
55 *et al.*, 2011; Erb *et al.*, 2015; Martinez-Medina *et al.*, 2016; Freundlich & Frost, 2018; Tugizimana *et*  
56 *al.*, 2018).

57 Although defense regulation by HIPVs has been documented extensively in plant leaves, much less is  
58 known about this phenomenon in the roots (Delory *et al.*, 2016). To the best of our knowledge, no study  
59 so far investigated the impact of root HIPVs on defense and resistance of neighboring plants. Roots emit  
60 specific volatile blends when attacked by herbivores (Rasmann *et al.*, 2005; Ali *et al.*, 2010; Delory *et*  
61 *al.*, 2016). These volatiles can diffuse through the soil and alter the behaviour of herbivores and natural  
62 enemies (Hiltpold & Turlings, 2008; Xavier *et al.*, 2017; Gfeller *et al.*, 2019). Recent work also found  
63 that constitutively released root volatiles can affect growth and defense expression in neighboring plants  
64 (Huang *et al.*, 2018; Gfeller *et al.*, 2019). Thus, it is conceivable that roots may also respond to root  
65 HIPVs in anticipation of root herbivore attack.

66 To test this hypothesis, we investigated HIPV-mediated root interactions in maize, one of the three most  
67 important crops worldwide (Shiferaw *et al.*, 2011). Maize plants are regularly attacked by root  
68 herbivores such as rootworms, which can cause substantial damage and yield losses (Tinsley *et al.*,  
69 2016). Maize leaves are highly responsive to leaf HIPVs such as indole and (Z)-3-hexenyl acetate  
70 (Engelberth *et al.*, 2004; Erb *et al.*, 2015; Hu *et al.*, 2019). Upon herbivore attack, maize roots emit  
71 distinct blends of HIPVs that contain terpenes such (E)- $\beta$ -caryophyllene, humulene and copaene  
72 (Rasmann *et al.*, 2005; Robert *et al.*, 2012b; Robert *et al.*, 2012a), but no detectable amounts of indole  
73 or GLVs. (E)- $\beta$ -caryophyllene can diffuse up to 20 cm.h<sup>-1</sup> in the soil matrix (Xavier *et al.*, 2017). To test  
74 if maize roots can use root HIPVs to prepare their defense system for incoming herbivore attack, we  
75 first assessed the impact of root HIPVs on maize primary metabolism and defense markers in the absence

76 of herbivory. Second, we assessed the impact of root HIPVs on root-herbivory induced changes in  
77 primary metabolism and defense markers. Third, we tested the effect HIPVs on plant growth and  
78 resistance. Fourth, we conducted cross-exposure experiments to assess the impact of leaf HIPVs on root  
79 resistance and *vice versa*. These experiments found no evidence for HIPV-mediated induction of root  
80 defenses, and suggest that roots do not respond to HIPVs by increasing their resistance to herbivores.

## 81 **MATERIALS AND METHODS**

### 82 *Plants and insects*

83 Maize seeds (*Zea mays* L., var. “Delprim”) were provided by Delley Semences et Plantes (DSP, Delley,  
84 CHE). Maize seeds were sown in plastic pots (diameter, 4cm; height, 11.2 cm; Patz GmbH  
85 Medizintechnik, Dorsten-Wulfen; DE) as described in (Erb *et al.*, 2011). The seedlings were fertilized  
86 twice a week after germination with MioPlant Vegetal and Herbal Fertilizer (Migros, CHE). Twelve-  
87 day old plants with three fully developed leaves were used for the experiments. Eggs of the banded  
88 cucumber beetle *Diabrotica balteata* (Coleoptera: Chrysomelidae) were kindly provided by Oliver  
89 Kindler (Syngenta, Stein, CHE). Hatching larvae were reared on freshly germinated maize seedlings  
90 (var. Akku, DSP, CHE). Second-instar larvae were used in the experiments. The larval instars were  
91 determined according to the head capsule size as previously described (George & Hintz, 1966). Plant  
92 infestations were performed by placing six larvae in two 4-5 cm deep holes in the sand. Eggs of the  
93 Egyptian cotton leafworm *Spodoptera littoralis* were provided by the University of Neuchâtel and reared  
94 on artificial diet until use.

### 95 *Characterization of root HIPV production by emitter plants*

96 To determine the HIPV profile emitted by root-infested plants over time, maize plants were placed into  
97 L-shaped glass pots (diameter: 5 cm; depth: 11 cm; Verre & Quartz Technique SA, Neuchâtel, CHE).  
98 Moist white sand (Migros, CHE) was added to fill the pots. The L-pots were wrapped in aluminium foil  
99 to keep the root system in the dark and prevent degradation of volatile compounds. Two days later, half  
100 the plants were infested with six second-instar *D. balteata* larvae. Control and infested maize roots were  
101 collected after one, two, three, four or eight days (n=5-7 per treatment and per day). The roots were  
102 ground in liquid nitrogen using a mortar and a pestle. An aliquot of 100 mg was used to measure root  
103 volatile production by solid phase micro extraction gas chromatography coupled to mass spectrometry  
104 (SPME-GC-MS, Agilent 7820A GC coupled to an Agilent 5977E MS, Agilent Technologies, Santa  
105 Clara, CA, USA). Briefly, a 100 µm polydimethylsiloxane SPME fibre (Supelco, Bellefonte, PA, USA)  
106 was inserted through the septum of the root containing glass vial (20 mL Precision Thread Headspace-  
107 Vial and UltraClean 18 mm Screw caps, Gerstel GmbH & Co., Mülheim an der Ruhr, DE) and exposed  
108 to the vial headspace for 40 min at 50°C. The fibre was inserted into the GC injection port (220°C) and  
109 desorbed. Chromatography was performed using an apolar column (DB1-MS, 30 m, 0.25 mm internal  
110 diameter, 0.25 µm film thickness; J & W Scientific, Folsom, CA, USA). Helium was used as carrier gas

111 at a constant pressure of 50.6 kPa. The column temperature was maintained at 60 °C for 1 min and then  
112 increased to 250 °C at 5 °C min<sup>-1</sup> followed by a final stage of 4 min at 250 °C. Volatile identification  
113 was obtained by comparing their mass spectra with those of the NIST05 Mass Spectra Library.

#### 114 ***Root herbivore migration timing***

115 To determine the most realistic experimental timing for the response phase of neighboring plants, we  
116 evaluated the time window during which *D. balteata* root herbivores are most likely to migrate from an  
117 infested to a neighboring plant. Maize plants were potted into 100 mL pots with two 5 mm diameter  
118 openings at the bottom. Each pot was placed in a plastic cup (12 x 25 x 10 cm WxLxH, OBI Group  
119 Holding SE & Co.KGaA, Schaffhausen, CHE) filled with a 3 cm high layer of tap water. All plants  
120 (n=6) were infested with six second-instar *D. balteata* larvae. The larvae moving away from the plant  
121 through the openings or from the top of the pot were therefore trapped in water and collected daily.

#### 122 ***Exposure to belowground HIPVs***

123 To test whether plant exposure to belowground HIPVs induces a response in neighboring plants,  
124 belowground two-arm olfactometers were used as previously described (Robert *et al.*, 2012a). Briefly,  
125 maize plants were placed into L-shaped glass pots (diameter: 5 cm; depth: 11 cm). Moist white sand  
126 (Migros, CHE) was added to fill the pots. The L-pots were wrapped in aluminium foil to keep the root  
127 system in the dark and prevent degradation of volatile compounds. Two days later, pots containing plants  
128 of similar sizes were connected in pairs using two Teflon connectors and one glass connector (length, 8  
129 cm; diameter, 2.2 cm, VQT, Neuchâtel, CHE). The Teflon connectors contained a fine metal screen  
130 (2300 mesh; Small Parts Inc., Miami Lakes, FL, USA) to restrain the larvae from moving to the second  
131 plant. The glass connectors remained empty to only allow volatile compounds to diffuse through the  
132 system. Each pair included one emitter plant and one receiver plant. Emitter plants were either infested  
133 with six second-instar *D. balteata* larvae or remained uninfested. Receiver plants were exposed to  
134 emitter plants for four days prior to any treatment. After this four days exposure period, receiver plants  
135 were either infested with six root herbivore larvae or left uninfested depending on the experiments. All  
136 pairs remained connected until collection of the samples.

#### 137 ***Root responses to root HIPVs***

138 To evaluate how exposure to HIPVs affects the metabolism of maize plants in absence and presence of  
139 herbivores, two independent experiments were conducted. In the first experiment, primary metabolism  
140 and defenses of receiver plants were characterized after four days exposure to HIPVs in absence of  
141 herbivory (n=9 per treatment). In the second experiment, receiver plants were infested with six second-  
142 instar *D. balteata* larvae, and primary metabolism and defenses were measured 1, 3, 6, 9 and 12 hr after  
143 the onset of herbivory (n=3-7). In all experiments, maize roots were collected, gently washed with tap  
144 water, flash frozen in liquid nitrogen and ground to a fine powder for further analyses. Plant primary

145 metabolism was assessed by measuring sucrose, glucose, fructose and starch using enzymatic assays  
146 (Velterop & Vos, 2001; Smith & Zeeman, 2006; Machado *et al.*, 2013), soluble proteins using  
147 colorimetric assays (Bradford, 1976; Jongasma *et al.*, 1994), free amino acids using HPLC-MS (Li *et al.*,  
148 2018), and the expression of the carbohydrate transporters *Zm-stp1*, *Zm-zifl2* by q-RT-PCR (Robert *et al.*  
149 *et al.*, 2012b) (Supporting Information Table S1). Plant secondary metabolism was characterized by  
150 performing untargeted metabolomic analyses by UHPLC-qTOF-MS (Hu *et al.*, 2018), measuring  
151 concentrations of benzoxazinoids by UHPLC-qTOF-MS (Hu *et al.*, 2018), and volatile emissions by  
152 GC-MS as described above. Plant defense expression was characterized by measuring stress hormones  
153 by UHPLC-MS/MS (Glauser *et al.*, 2014) and defense marker genes, including genes involved in  
154 volatile production (*Zm-tps23*, *Zm-igl*); hormonal signalling (*Zm-saur2*, *Zm-nced*, *Zm-orp7*, *Zm-lox5*  
155 *Zm-acs6*) and direct defenses (*Zm-cysII*, *Zm-cyst*, *Zm-serpin*, *Zm-mpi*, *Zm-bx1*, *Zm-pal*, *Zm-pr1*) by q-  
156 RT-PCR (Robert *et al.* 2012b). For a more detailed description of these genes, refer to (Robert *et al.*  
157 2012b) and Supplementary Information Table S1.

### 158 ***Plant and herbivore performance following root exposure to root HIPVs***

159 To determine whether exposure to root HIPVs impacts the performance of root herbivores, belowground  
160 two-arm olfactometers were used as described above. After four days exposure to control or infested  
161 emitter plants, all receiver plants were infested with six pre-weighed root herbivore larvae (n=18 per  
162 treatment). Four days later, all larvae feeding on receiver plants were recovered and weighed. Maize  
163 roots from the plants were collected for damage evaluation (Oleson *et al.*, 2005) and weighed.

### 164 ***Cross-exposure experiment***

165 To assess whether priming is tissue-specific, cross exposure experiments were conducted by exposing  
166 roots or leaves to volatiles emitted by either control or infested roots or leaves of emitter plants (n=4-5  
167 per treatment). All plants were potted in L-pots as described above. Emitter plants were either infested  
168 with six second-instar *D. balteata* (root herbivory), three fourth-instar *S. littoralis* larvae (leaf herbivory)  
169 or left uninfested. All plants were covered with plastic bags (Bratbeutel Tangan N°34, Genossenschaft  
170 Migros Aare, Urtenen-Schönbühl, CHE). Emitter and receiver plants were paired using the glass  
171 connectors described above. The glass connectors were used to connect roots to roots, roots to leaves,  
172 leaves to roots or leaves to leaves. To connect a leaf compartment, a 3 cm opening was made in the  
173 plastic bag to insert the connector. The bag was then sealed around the glass connector with a rubber  
174 band and tape. The headspace of emitter plants was connected to a multiple air-delivery system via  
175 PTFE tubing. Purified air was pushed in the system at a flow rate of 0.3 L.min<sup>-1</sup>. After 17 hr exposure  
176 to emitter plants (from 5 pm to 10 am the next day), all systems were disconnected and bags removed.  
177 Three pre-weighed *S. littoralis* or six pre-weighed second-instar *D. balteata* larvae were added to  
178 receiver plants and new plastic bags were added to all plants. After 2 days, all larvae were collected and  
179 weighed.

## 180 *Statistical Analyses*

181 Statistical analyses were conducted using R (version 3.5.3, <https://www.r-project.org>) and Sigma Plot  
182 (version 13, Systat Software, San Jose, CA). All data were first tested for normality and  
183 heteroscedasticity of error variance using Shapiro-Wilk and Brown-Forsythe tests. Data fitting  
184 normality and variance equality assumptions were analyzed using Analysis of Variance (ANOVA). Data  
185 that did not fit normality and equality of variance were analyzed using Mann-Whitney Rank Sum tests  
186 (U tests) and ANOVAs on ranks. Metabolomic and volatile data were analyzed using principal  
187 component analyses (PCA) followed by PPLS-DA and permutation tests.

## 188 **RESULTS**

### 189 *Root herbivory induces a distinct bouquet of root volatiles*

190 To characterize belowground HIPVs, we measured root volatile production from the plants over 8 days  
191 infestation. Root-herbivore infested plants produced distinct bouquets of volatile compounds over the  
192 entire exposure period, including high amounts of (*E*)- $\beta$ -caryophyllene, caryophyllene oxide and  
193 copaene (Fig. 1).

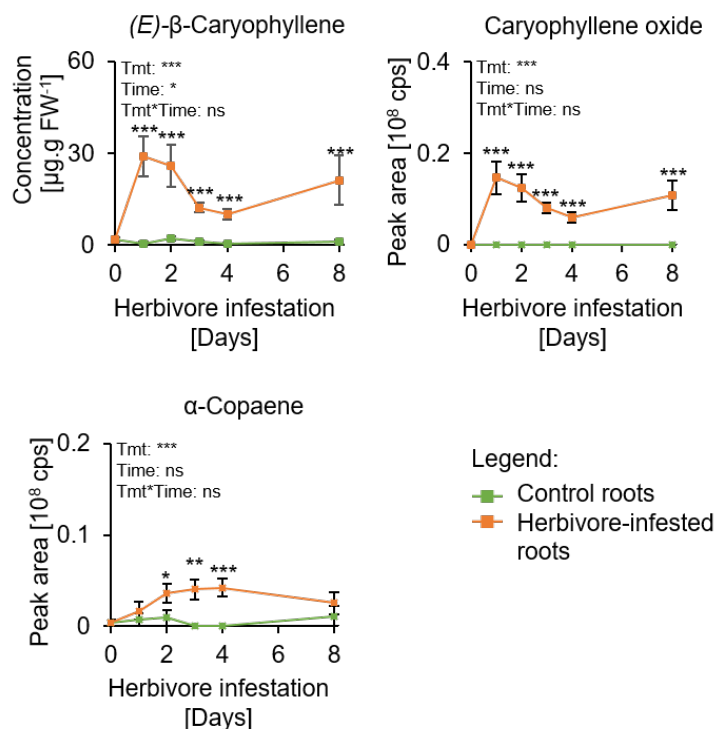

194

195 **Figure 1. Root herbivory induces terpene volatiles from maize root.** (*E*)- $\beta$ -caryophyllene, caryophyllene oxide, and  $\alpha$ -  
196 copaene emissions by control (green) and infested maize roots (orange) after 0-8 days (Mean  $\pm$  se, Two way ANOVA, n=5-7).  
197 (*E*)- $\beta$ -Caryophyllene was identified and quantified using a standard curve of the pure compound. Caryophyllene oxide and  $\alpha$ -  
198 copaene were identified by using the NIST library (Match >85%). Tmt: Treatment. cps: Counts per second. Stars indicate  
199 significant differences (\*:  $p \leq 0.05$ ).

200



201 ***Root herbivores migrate away from infested plants 1-4 days after the start of infestation***

202 To assess the probability of a neighboring plant to be attacked, we measured larval migration from the  
203 plants over time. Root herbivore larvae migrated away from the first day on: After one day, 23.3% of  
204 the larvae were recovered outside the pots, and after four days, more than 60% had migrated away from  
205 the plant (Supplementary Information Fig. S1). Thus, response plants were exposed to root HIPVs for  
206 four days in subsequent experiments.

207 ***Root HIPVs do not directly induce defenses in neighboring root systems***

208 To evaluate whether belowground exposure to root HIPVs induces physiological changes in neighboring  
209 plants, we characterized the primary metabolism and defenses of maize roots exposed to control or root-  
210 herbivore infested volatiles over four days. The expression of marker genes involved in plant primary  
211 and secondary metabolism was not significantly altered by HIPV exposure (Fig. 2a). Phytohormone  
212 production was similar between control and HIPV-exposed roots, except for jasmonic acid (JA) and its  
213 isoleucine conjugate (JA-Ile), for which levels were slightly lower in HIPV-exposed roots than control  
214 roots (Fig. 2b). Individual and total soluble sugars, starch, protein, and amino acid concentrations were  
215 not affected by exposure to root HIPVs (Figs. 2c-e). Also, no significant effects on benzoxazinoids, the  
216 most abundant root secondary metabolites, were observed (Fig. 2f). Untargeted metabolomics (511 and  
217 1763 features were detected in negative and positive modes, respectively) did not reveal differential  
218 clustering of chemicals (Figs. 2h-i). Finally, root volatile production remained unchanged between  
219 control and HIPV-exposed plants (Figs. 2g and j).

220 ***Root HIPVs do not change root defense induction in neighboring root systems***

221 To investigate whether belowground HIPV-exposure alters responses to herbivory in the roots of  
222 neighboring plants, we characterized root responses to infestation by *D. balteata*. Marker genes involved  
223 in plant response to root herbivory (Robert *et al.*, 2012b) responded similarly in control and HIPV-  
224 exposed maize plants, with the exception of *acs6* (Fig. 3a). The production of abscisic acid (ABA), oxo-  
225 phytodienoic acid (OPDA) and JA and JA-Ile increased upon root herbivory but was not influenced by  
226 HIPV exposure (Fig. 3b). Carbohydrate concentrations were similar in control than in HIPV-exposed  
227 plants although HIPV-exposed plants overall had lower fructose concentrations than control plants (Fig.  
228 3c). Soluble proteins, and amino acids responded to herbivory independently of HIPV exposure (Figs.  
229 3d-e). Untargeted metabolomics (443 and 1906 features detected in negative and positive modes,  
230 respectively) and benzoxazinoid profiling did not reveal differential clustering or differences in  
231 concentrations (Figs. 3f, h-i). Volatiles were induced similarly by herbivory, independently of previous  
232 exposure to HIPVs (Figs. 3g and j).

233



Figure 2. Responses of maize roots to herbivore-induced plant volatiles from neighboring roots

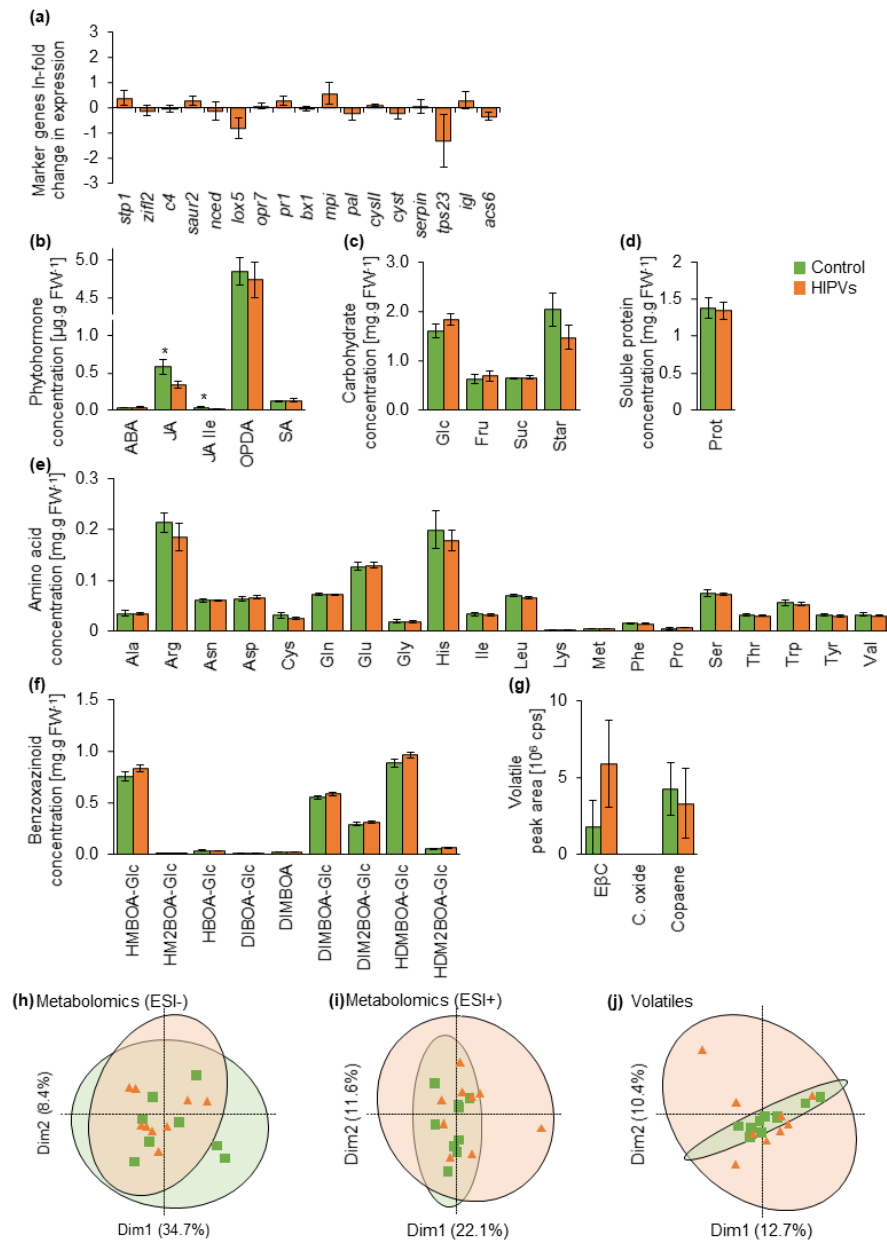

234

235 **Figure 2. Belowground herbivore-induced plant volatiles (HIPVs) do not affect plant metabolism in absence of**  
 236 **herbivory.** (a) Ln fold changes in gene expression (Mean  $\pm$  se, Student's t-tests and Mann-Whitney U tests, n =9) in maize  
 237 roots exposed for four days to plants infested with six *Diabrotica balteata* larvae (HIPVs) relative to maize roots exposed to control plants.  
 238 (b) Phytohormone production (Mean  $\pm$  se, Mann-Whitney U tests, n = 9) in maize roots exposed for four days to control plants (control, green) or to plants infested with six *D. balteata* larvae (HIPVs, orange). (c-f) Concentrations (Mean  
 239  $\pm$  se, Student's t-tests and Mann-Whitney U tests, n = 9) of (c) glucose, fructose, sucrose, and starch, (d) proteins, (e) amino  
 240 acids, and (f) benzoxazinoids in roots of maize plants exposed for four days to control plants (control, green) or to plants  
 241 infested with six *D. balteata* larvae (HIPVs, orange). (h-i) Principal Component Analysis of all features detected (PLS DA, n  
 242 = 9) in roots of maize plants exposed for four days to control plants (control, green) or to plants infested with six *D. balteata*  
 243 larvae (HIPVs, orange) using untargeted metabolomic analysis in (h) negative (511 features) and (i) positive modes (1763  
 244 features). (j) Principal Component Analysis of volatile emissions (PLS DA, n = 9) and (g) terpene volatile emissions by roots  
 245 of maize plants exposed for four days to control plants (control, green) or to plants infested with six *D. balteata* larvae (HIPVs,  
 246 orange). E $\beta$ C: (*E*)- $\beta$ -caryophyllene. C. oxide: Caryophyllene oxide. Stars indicate significant differences (\*:  $p \leq 0.05$ ).  
 247

Figure 3.

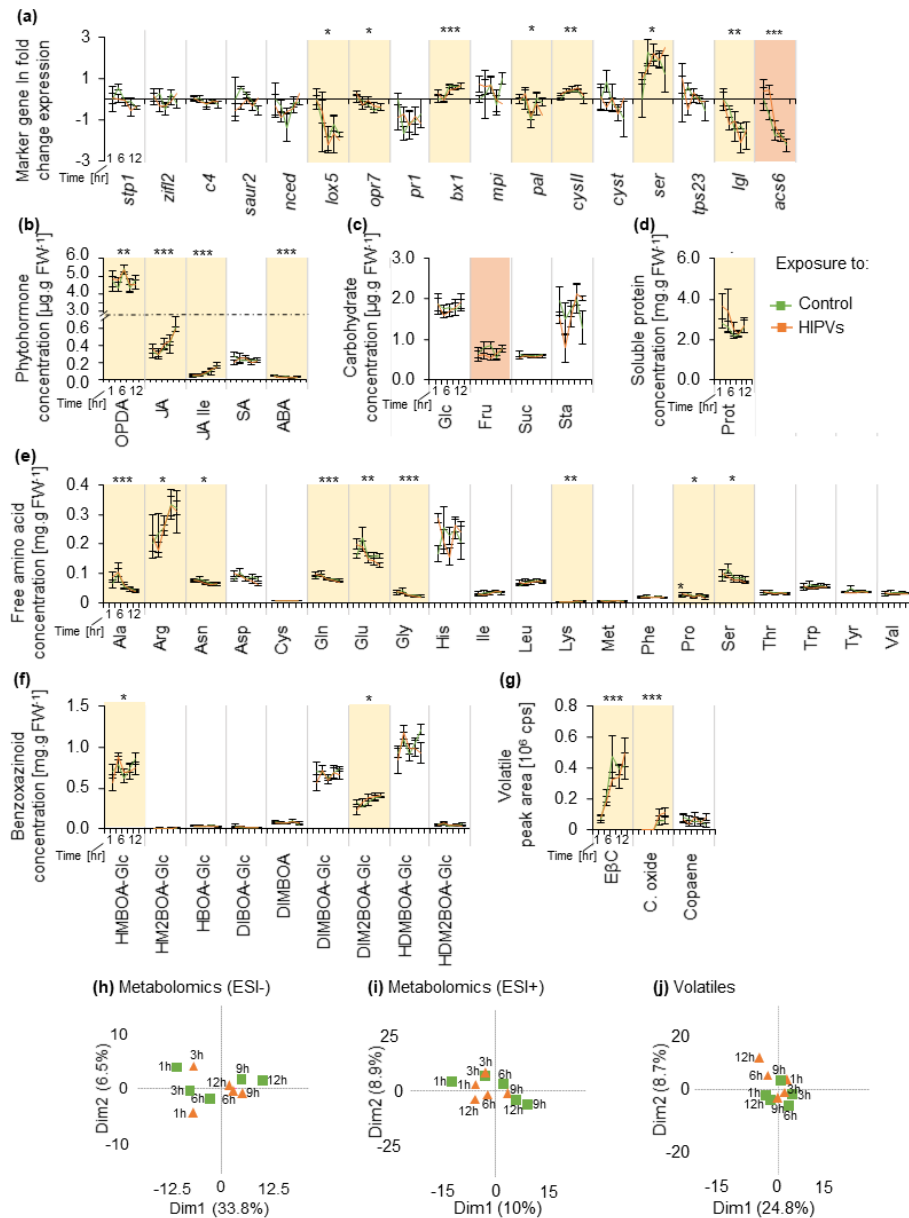

248

249 **Figure 3. Exposure to an infested neighboring plant does not change the plant response to *D. balteata*'s attack.** (a) Ln  
 250 fold changes in gene expression (Mean  $\pm$  se, Two way ANOVA, n=3-7) in maize roots exposed for four days to plants infested  
 251 with six *Diabrotica balteata* larvae relative to maize roots exposed to control plants prior attack by *D. balteata* for 1-12 hours.  
 252 (b) Phytohormone production (Mean  $\pm$  se, Two way ANOVA, n=3-7) maize roots exposed for four days to control plants  
 253 (control, green) or to plants infested with six *D. balteata* larvae (HIPVs, orange) prior attack by *D. balteata* for 1-12 hours. (c-  
 254 f) Concentrations (Mean  $\pm$  se, Two way ANOVA, n = 3-7) of (c) glucose, fructose, sucrose, and starch, (d) proteins, (e) amino  
 255 acids, and (f) benzoxazinoids in maize roots exposed for four days to control plants (control, green) or to plants infested with  
 256 six *D. balteata* larvae (HIPVs, orange) prior attack by *D. balteata* for 1-12 hours. (h-i) Principal Component Analysis of all  
 257 features detected (PLS DA, n = 3-7) in maize roots exposed for four days to control plants (control, green) or to plants infested  
 258 with six *D. balteata* larvae (HIPVs, orange) prior attack by *D. balteata* for 1-12 hours, using untargeted metabolomic analysis  
 259 in (h) negative (443 features) and (i) positive modes (1906 features). (j) Principal Component Analysis of volatile emissions  
 260 (PLS DA, n = 3-7) and (g) terpene volatiles emissions by maize roots exposed for four days to control plants (control, green)  
 261 or to plants infested with six *D. balteata* larvae (HIPVs, orange) prior attack by *D. balteata* for 1-12 hours. Only averages per  
 262 treatment are presented in principal component analyses. E $\beta$ C: (*E*)- $\beta$ -caryophyllene. C. oxide: Caryophyllene oxide. Yellow  
 263 shading and stars indicate significant differences over time (\*:  $p \leq 0.05$ , \*\*:  $p \leq 0.01$ , \*\*\*:  $p \leq 0.001$ ). Orange shading indicate  
 264 significant differences between exposure treatments ( $p \leq 0.05$ ). No interaction between time and exposure was found to be  
 265 significant.

266 ***Belowground HIPVs do not increase plant resistance to root herbivory in maize and teosinte***

267 To investigate whether exposure to root HIPVs increases plant resistance in maize or its wild ancestor  
268 teosinte, we measured herbivore performance and root damage on control and HIPV-exposed root  
269 systems. Exposure to HIPVs emitted by one or three neighboring plants did not alter the herbivore  
270 performance, survival, root damage and root fresh mass in both maize and teosinte (Figs. 4, S2).

Figure 4.

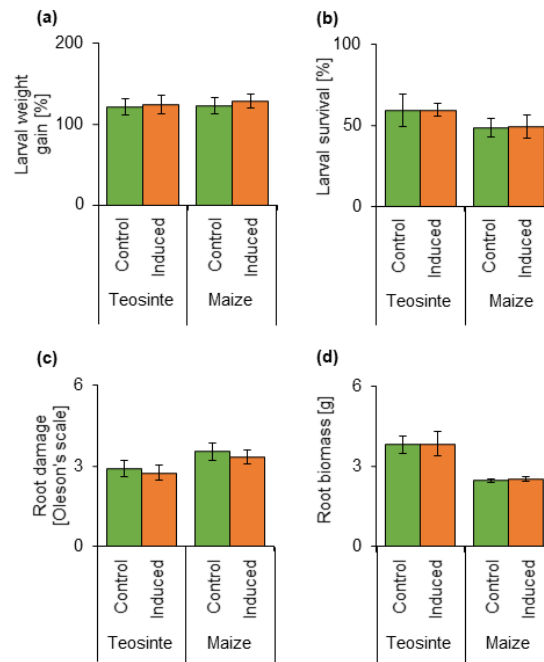

271

272 **Figure 4. Exposure to an infested neighboring plant does not alter plant defense to herbivory.** (a) Relative larval weight  
273 gain (Mean ± se, Student's t-tests) of the root herbivore *Diabrotica balteata* feeding for four days on maize (n=17-18) or  
274 teosinte (n=8-9) previously exposed for four days to control plants (control, green) or to plants infested with six *D. balteata*  
275 larvae (HIPVs, orange). (b) Proportions (Mean ± se, Student's t-tests) of *D. balteata* recovered after 4 days infested on maize  
276 (n=18) and teosinte (n=9) previously exposed for four days to control plants (control, green) or to plants infested with six *D.*  
277 *balteata* larvae (HIPVs, orange). (c) *D. balteata* damage scaling (Mean ± se, Student's t-tests) after four days infestation of  
278 maize (n=18) and teosinte (n=9) plants previously exposed for four days to control plants (control, green) or to plants infested  
279 with six *D. balteata* larvae (HIPVs, orange). (d) Root fresh mass after four days infestation by the root herbivore *D. balteata*  
280 (Mean ± se, Student's t-tests) of maize (n=18) and teosinte (n=9) previously exposed for four days to control plants (control,  
281 green) or to plants infested with six *D. balteata* larvae (HIPVs, orange).

282 ***Roots are impaired in the emission and perception of resistance-inducing HIPVs***

283 To assess whether roots can perceive and respond to defense-inducing HIPVs, we conducted a cross-  
284 experiment where leaf or root tissues were exposed to HIPVs of either leaves or roots prior infestation.  
285 Leaf exposure to leaf HIPVs, but not to root HIPVs, lead to a decreased performance of *S. littoralis*  
286 caterpillars (Fig. 5a). Root exposure to either leaf or root HIPVs did not affect the root herbivore  
287 performance (Fig. 5b). Thus, root HIPVs do not trigger resistance in roots or leaves, and roots, in contrast  
288 to leaves, do not respond to leaf HIPVs through an increase in resistance. This result suggests that roots  
289 are impaired in both emission and perception of resistance-inducing HIPVs.

Figure 5.

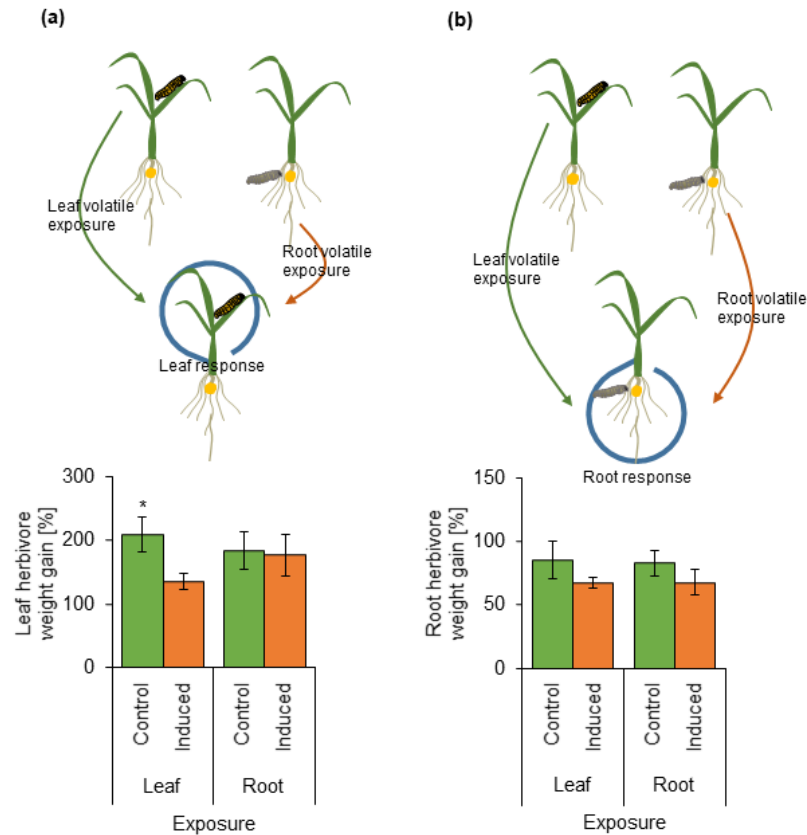

290

291 **Figure 5. Only leaf exposure to leaf HIPVs leads to a decreased performance of *Spodoptera littoralis* caterpillars.** (a)  
292 Relative larval weight gain (Mean  $\pm$  se, Two way ANOVA, n=4-5) of the leaf herbivore *S. littoralis* feeding for two days on  
293 leaves previously exposed for one night to control plants (control, green) or to plants infested with six *D. balteata* larvae  
294 (HIPVs, orange). (b) Relative larval weight gain (Mean  $\pm$  se, Two way ANOVA, n=4-5) of the root herbivore *D. balteata*  
295 feeding for two days on roots previously exposed for one night to control plants (control, green) or to plants infested with six  
296 *D. balteata* larvae (HIPVs, orange). Stars indicate significant differences within leaf herbivore performance (\*:  $p \leq 0.05$ ).

## 297 DISCUSSION

298 The current work shows that HIPV-mediated defense priming occurs in maize leaves, but not roots. The  
299 lack of root HIPV response contrasts with the well characterized responses in maize leaves (Engelberth  
300 *et al.*, 2004; Baldwin *et al.*, 2006; Heil & Silva Bueno, 2007; Rodriguez-Saona *et al.*, 2009; 2013;  
301 Skoczek *et al.*, 2017) and is discussed in detail below.

302 Leaves of many different species are known to respond to HIPVs by increasing their defense investment,  
303 and, sometimes also reduce their growth. A recent study furthermore found that volatiles that are  
304 constitutively emitted by *Centaurea stoebe* lead to changes in root carbohydrate and protein levels in  
305 *Taraxacum officinale* (Gfeller *et al.*, 2019; Huang *et al.*, 2019). However, *C. stoebe* is an unusually  
306 strong constitutive emitter of root terpenes, and whether plants respond to herbivory-induced changes  
307 in volatile as a form of “eavesdropping” remains unknown. Our study demonstrates that HIPV-exposed  
308 maize roots do not display any of the defense responses displayed by maize leaves and leaves of other

309 plant species (Farmer, 2001; Baldwin *et al.*, 2006; Frost *et al.*, 2008; Heil & Ton, 2008; Heil, 2014; Erb,  
310 2018; Turlings & Erb, 2018; Bouwmeester *et al.*, 2019). Despite prolonged exposure of maize roots to  
311 distinct blends of root HIPVs, we did not observe direct induction or priming of stress hormones,  
312 primary and secondary metabolites in these roots. On the contrary, we observed that root HIPVs slightly  
313 suppressed constitutive JA-Ile levels. This suppression however was gone 1 hr after herbivore attack.  
314 Defense marker genes were also not differentially expressed, with the exception of the ethylene  
315 biosynthesis gene *acs6*, which was less suppressed upon herbivore attack in HIPV exposed roots.  
316 However, these differences were not associated with measurable changes in metabolite accumulation,  
317 resistance or plant growth, despite the well-established roles of jasmonates and ethylene in root growth  
318 (Staswick *et al.*, 1992; Schaller, 2012; Huang *et al.*, 2017; Dubois *et al.*, 2018) and defense (McConn *et*  
319 *al.*, 1997; Bonaventure *et al.*, 2011; Erb *et al.*, 2012). This absence of phenotypic consequences could  
320 be because the changes in Ja-Ile and ethylene biosynthesis were too small and/or transient. Root  
321 resistance and plant growth were not affected in teosinte either, suggesting that the absence of HIPV  
322 responsiveness in maize roots is not due to plant domestication. From these results, we conclude that  
323 maize roots, in contrast to leaves, do not strongly respond to root HIPVs.

324 What are the physiological mechanisms that could be responsible for the tissue-specific absence of  
325 responsiveness of maize roots to root HIPVs? Our experiments suggest two mutually non-exclusive  
326 mechanisms: Absence of defense-inducing HIPVs and lack of HIPV responsiveness. Regarding the first  
327 mechanism, our experiments show that maize roots do not release any HIPVs that have been shown to  
328 mediate priming in maize leaves: GLVs and indole (Farmer, 2001; Engelberth *et al.*, 2004; Erb *et al.*,  
329 2015; Riedlmeier *et al.*, 2017; Ameye *et al.*, 2018). Instead, their HIPV profile is dominated by  
330 sesquiterpenes (Robert *et al.*, 2012a). Sesquiterpenes have been associated with priming in tomato,  
331 beans (Arimura *et al.*, 2000; Arimura *et al.*, 2001; Zhang *et al.*, 2019), but not in maize (Ruther &  
332 Fürstenau, 2005). This suggests that maize roots do not produce HIPV blends capable of triggering  
333 defense responses in neighbors. Why maize roots do not release GLVs and indole remains to be  
334 elucidated. GLVs are produced via the hydroperoxide lyase (HPL) branch of the oxylipin pathway  
335 (Kenji, 2006). The first step of GLV biosynthesis is to deacylate galactolipids to release the omega-3  
336 and omega-6 fatty acids,  $\alpha$ -linolenic acid and linoleic acid (Matsui *et al.*, 2000; Kombrink, 2012). The  
337 hydroperoxidation of  $\alpha$ -linolenic and of linoleic acid results in the production of Z-3-hexenal and n-  
338 hexenal respectively (Moataz *et al.*, 2017). Yet, maize roots contains only trace amounts of linolenic  
339 acid in favour of high concentrations of linoleic acid (Bernklau & Bjostad, 2008). This limitation in  
340 linolenic acid contents in the roots may explain the absence of Z-3-hexenal, as well as its alcohol and  
341 acetyl GLV downstream products (Z-3 and E-2 hexenol, Z-3 and E-2 hexenyl acetate). The lack of indole  
342 release is likely due to a different mechanism, as indole-3-glycerol-phosphate, the precursor of indole  
343 (Frey *et al.*, 2009), is abundant in maize roots. However, the indole-3-glycerol phosphate lyase, which  
344 is responsible for volatile indole production (Frey *et al.*, 2000) seems to be suppressed upon *D. balteata*  
345 attack in the roots, which may explain the absence of volatile indole in the headspace of attacked roots.

346 Regarding the second mechanism, our experiments show that maize roots do not seem capable of  
347 increasing their resistance in response to bioactive HIPV blends which are capable of inducing resistance  
348 in the leaves. This suggests that maize roots can either not perceive or not translate HIPVs into resistance  
349 responses. A better understanding of HIPV perception and early signalling will help to test these  
350 hypotheses in the future.

351 From an adaptive point of view, the question arises why maize plants did evolve the capacity to perceive  
352 HIPVs in their leaves, but not their roots. A possible explanation may be that the transfer of HIPVs  
353 between plants in the rhizosphere is unreliable. First, volatile dispersal, conversion or degradation in the  
354 soil strongly depends on matrix properties (Hayward *et al.*, 2001; Owen *et al.*, 2007; Perry *et al.*, 2007;  
355 Hiltbold & Turlings, 2008; Seo *et al.*, 2009; Ramirez *et al.*, 2010; Peñuelas *et al.*, 2014; Xavier *et al.*,  
356 2017). Volatile compounds, such as indole, linalool,  $\alpha$ -pinene, and limonene, can be degraded upon  
357 release and used as source of carbon for soil dwelling micro-organisms (Misra *et al.*, 1996; Arora *et al.*,  
358 2015; Arora *et al.*, 2015; Ma *et al.*, 2018; Owen *et al.*, 2007; Arora *et al.*, 2015; Ma *et al.*, 2018). Second,  
359 root HIPVs may be less reliable signals, as soil microorganisms produce a wide variety of volatile  
360 compounds. Terpenes such as copaene, (*E*)- $\beta$ -caryophyllene and caryophyllene oxide are also produced  
361 by soil micro-organisms (Insam & Seewald, 2010; Wenke *et al.*, 2010; Schenkel *et al.*, 2015; Delory *et*  
362 *al.*, 2016). Thus, we propose that the unreliable transfer and the low specificity of root HIPVs may have  
363 impeded the evolution of HIPV perception in maize roots. Instead, alternative strategies to eavesdrop  
364 on neighbors may have emerged, including mycorrhizal networks (Perry, 1995; Selosse *et al.*, 2006; van  
365 der Heijden & Horton, 2009; Jung *et al.*, 2012; Song *et al.*, 2013; Shahzad *et al.*, 2015; Song *et al.*,  
366 2019).

367 In summary, our work shows that plant-plant interactions mediated by herbivore-induced plant volatiles  
368 are tissue specific and restricted to the leaves in wild and cultivated maize, and that this tissue-specificity  
369 is likely driven by a lack of bioactive cues and a lack of perception capacity of roots. We suggest that  
370 the low reliability and specificity of volatiles as danger cues in the rhizosphere together with the  
371 availability of other information transfer networks may have impeded the evolution of eavesdropping  
372 mechanisms in plant roots.

### 373 **ACKNOWLEDGEMENTS**

374 We are really grateful to Anita Streit who reared the insects used in this project. We thank Jean Daniel  
375 Berset for his technical assistance. This work was supported by the University of Bern (UniBe 2021)  
376 and the Oeschger Centre for Climate Change Research (OCCR).

### 377 **AUTHOR CONTRIBUTIONS**

378 CAMR designed the project. CAMR supervised the project. CvD, TZ, CM, XZ, RARM, RM, MY,  
379 BCJS, and GG performed the experiments. CvD, CAMR, TZ, RARM and GG analyzed the data. CvD  
380 and CAMR wrote the first draft. All authors reviewed and approved the manuscript.



381 **REFERENCES**

- 382 **Ali JG, Alborn HT, Stelinski LL. 2010.** Subterranean herbivore-induced volatiles released by citrus  
383 roots upon feeding by *Diaprepes abbreviatus* recruit entomopathogenic nematodes. *Journal of*  
384 *Chemical Ecology* **36**: 361–368.
- 385 **Ameye M, Allmann S, Verwaeren J, Smagghe G, Haesaert G, Schuurink RC, Audenaert K. 2018.**  
386 Green leaf volatile production by plants: a meta-analysis. *New Phytologist* **220**: 666–683.
- 387 **Arimura G-i, Ozawa R, Horiuchi J-i, Nishioka T, Takabayashi J. 2001.** Plant–plant interactions  
388 mediated by volatiles emitted from plants infested by spider mites. *Biochemical Systematics and*  
389 *Ecology* **29**: 1049–1061.
- 390 **Arimura G-i, Ozawa R, Shimoda T, Nishioka T, Boland W, Takabayashi J. 2000.** Herbivory-  
391 induced volatiles elicit defence genes in lima bean leaves. *Nature* **406**: 512–515.
- 392 **Arora PK, Sharma A, Bae H, Li QX. 2015.** Microbial degradation of indole and its derivatives.  
393 *Journal of Chemistry* **2015**: 129159.
- 394 **Baldwin IT. 2010.** Plant volatiles. *Current Biology* **20**: R392-7.
- 395 **Baldwin IT, Halitschke R, Paschold A, Dahl CC von, Preston CA. 2006.** Volatile signaling in plant-  
396 plant interactions: “talking trees” in the genomics era. *Science* **311**: 812–815.
- 397 **Bate NJ, Rothstein SJ. 1998.** C6-volatiles derived from the lipoxygenase pathway induce a subset of  
398 defense-related genes. *The Plant Journal for Cell and Molecular Biology* **16**: 561–569.
- 399 **Bernklau EJ, Bjostad LB. 2008.** Identification of feeding stimulants in corn roots for western corn  
400 rootworm (Coleoptera: Chrysomelidae) larvae. *Journal of Economic Entomology* **101**: 341–351.
- 401 **Bonaventure G, VanDoorn A, Baldwin IT. 2011.** Herbivore-associated elicitors: FAC signaling and  
402 metabolism. *Trends in Plant Science* **16**: 294–299.
- 403 **Bouwmeester H, Schuurink RC, Bleeker PM, Schiestl F. 2019.** The role of volatiles in plant  
404 communication. *The Plant Journal* **100**: 892–907.
- 405 **Bradford MM. 1976.** A rapid and sensitive method for the quantitation of microgram quantities of  
406 protein utilizing the principle of protein-dye binding. *Analytical Biochemistry* **72**: 248–254.
- 407 **Delory BM, Delaplace P, Fauconnier M-L, Du Jardin P. 2016.** Root-emitted volatile organic  
408 compounds: can they mediate belowground plant-plant interactions? *Plant and Soil* **402**: 1–26.
- 409 **Dubois M, van den Broeck L, Inzé D. 2018.** The pivotal role of ethylene in plant growth. *Trends in*  
410 *Plant Science* **23**: 311–323.
- 411 **Engelberth J, Alborn HT, Schmelz EA, Tumlinson JH. 2004.** Airborne signals prime plants against  
412 insect herbivore attack. *Proceedings of the National Academy of Sciences of the United States of*  
413 *America* **101**: 1781–1785.
- 414 **Erb M. 2018.** Volatiles as inducers and suppressors of plant defense and immunity—origins, specificity,  
415 perception and signaling. *Current Opinion in Plant Biology* **44**: 117–121.

- 416 **Erb M, Balmer D, Lange ES de, Merey G von, Planchamp C, Robert CAM, Röder G, Sobhy I,**  
417 **Zwahlen C, Mauch-Mani B et al. 2011.** Synergies and trade-offs between insect and pathogen  
418 resistance in maize leaves and roots. *Plant, Cell & Environment* **34**: 1088–1103.
- 419 **Erb M, Flors V, Karlen D, Lange E de, Planchamp C, D’Alessandro M, Turlings TCJ, Ton J.**  
420 **2009.** Signal signature of aboveground-induced resistance upon belowground herbivory in maize. *The*  
421 *Plant Journal* **59**: 292–302.
- 422 **Erb M, Glauser G, Robert CAM. 2012.** Induced immunity against belowground insect herbivores-  
423 activation of defenses in the absence of a jasmonate burst. *Journal of Chemical Ecology* **38**: 629–640.
- 424 **Erb M, Veyrat N, Robert CAM, Xu H, Frey M, Ton J, Turlings TCJ. 2015.** Indole is an essential  
425 herbivore-induced volatile priming signal in maize. *Nature Communications* **6**: 6273 EP -.
- 426 **Farag MA, Fokar M, Abd H, Zhang H, Allen RD, Paré PW. 2005.** (Z)-3-Hexenol induces defense  
427 genes and downstream metabolites in maize. *Planta* **220**: 900–909.
- 428 **Farmer EE. 2001.** Surface-to-air signals. *Nature* **411**: 854 EP -.
- 429 **Freundlich GE, Frost CJ. 2018.** Variable costs and benefits of eavesdropping a green leaf volatile on  
430 two plant species in a common garden. [biorxiv.org/content/10.1101/370692v1](https://doi.org/10.1101/370692v1).
- 431 **Frey M, Schullehner K, Dick R, Fiesselmann A, Gierl A. 2009.** Benzoxazinoid biosynthesis, a model  
432 for evolution of secondary metabolic pathways in plants. *Phytochemistry* **70**: 1645–1651.
- 433 **Frey M, Spiteller D, Boland W, Gierl A. 2004.** Transcriptional activation of *Igl*, the gene for indole  
434 formation in *Zea mays*: A structure-activity study with elicitor-active N-acyl glutamines from insects.  
435 *Phytochemistry* **65**: 1047–1055.
- 436 **Frey M, Stettner C, Paré PW, Schmelz EA, Tumlinson JH, Gierl A. 2000.** An herbivore elicitor  
437 activates the gene for indole emission in maize. *Proceedings of the National Academy of Sciences of*  
438 *the United States of America* **97**: 14801–14806.
- 439 **Frost CJ, Mescher MC, Carlson JE, Moraes CM de. 2008.** Plant defense priming against herbivores:  
440 Getting ready for a different battle. *Plant Physiology* **146**: 818–824.
- 441 **Gao X, Starr J, Göbel C, Engelberth J, Feussner I, Tumlinson JH, Kolomiets M. 2008.** Maize 9-  
442 lipooxygenase *ZmLOX3* controls development, root-specific expression of defense genes, and  
443 resistance to root-knot nematodes. *Molecular Plant-Microbe Interactions* **21**: 98–109.
- 444 **George BW, Hintz AM. 1966.** Immature stages of the Western Corn Rootworm. *Journal of Economic*  
445 *Entomology* **59**: 1139–1142.
- 446 **Gfeller V, Huber M, Förster C, Huang W, Köllner TG, Erb M. 2019.** Root volatiles in plant–plant  
447 interactions I: High root sesquiterpene release is associated with increased germination and growth  
448 of plant neighbours. *Plant, Cell & Environment* **42**: 1950–1963.
- 449 **Glauser G, Vallat A, Balmer D. 2014.** Hormone profiling. *Methods in Molecular Biology (Clifton,*  
450 *N.J.)* **1062**: 597–608.
- 451 **González-Bosch C. 2018.** Priming plant resistance by activation of redox-sensitive genes. *Free Radical*  
452 *Biology and Medicine* **122**: 171–180.

- 453 **Hajiahmadi Z, Shirzadian-Khorramabad R, Kazemzad M, Sohani MM. 2017.** *In silico* analysis  
454 and transient expression of wound-inducible promoter *MPI* in tomato (*Lycopersicon esculentum* Mill.  
455 cv. CH). *Plant Omics* **10**: 118–126.
- 456 **Hayward S, Muncey RJ, James AE, Halsall CJ, Hewitt CN. 2001.** Monoterpene emissions from soil  
457 in a Sitka spruce forest. *Atmospheric Environment* **35**: 4081–4087.
- 458 **Heil M. 2014.** Herbivore-induced plant volatiles: targets, perception and unanswered questions. *New*  
459 *Phytologist* **204**: 297–306.
- 460 **Heil M, Silva Bueno JC. 2007.** Within-plant signaling by volatiles leads to induction and priming of  
461 an indirect plant defense in nature. *Proceedings of the National Academy of Sciences of the United*  
462 *States of America* **104**: 5467–5472.
- 463 **Heil M, Ton J. 2008.** Long-distance signalling in plant defence. *Trends in Plant Science* **13**: 264–272.
- 464 **Hiltpold I, Turlings TCJ. 2008.** Belowground chemical signaling in maize: When simplicity rhymes  
465 with efficiency. *Journal of Chemical Ecology* **34**: 628–635.
- 466 **Hirao T, Okazawa A, Harada K, Kobayashi A, Muranaka T, Hirata K. 2012.** Green leaf volatiles  
467 enhance methyl jasmonate response in Arabidopsis. *Journal of Bioscience and Bioengineering* **114**:  
468 540–545.
- 469 **Hu L, Mateo P, Ye M, Zhang X, Berset J-D, Handrick V, Radisch D, Grabe V, Koellner TG,**  
470 **Gershenson J et al. 2018.** Plant iron acquisition strategy exploited by an insect herbivore. *Science*  
471 **361**: 694-697.
- 472 **Hu L, Ye M, Erb M. 2019.** Integration of two herbivore-induced plant volatiles results in synergistic  
473 effects on plant defence and resistance. *Plant, Cell & Environment* **42**: 959–971.
- 474 **Huang H, Liu B, Liu L, Song S. 2017.** Jasmonate action in plant growth and development. *Journal of*  
475 *Experimental Botany* **68**: 1349–1359.
- 476 **Huang W, Gfeller V, Erb M. 2019.** Root volatiles in plant–plant interactions II: Root volatiles alter  
477 root chemistry and plant–herbivore interactions of neighbouring plants. *Plant, Cell & Environment*  
478 **42**: 1964–1973.
- 479 **Huang W, Zwimpfer E, Hervé MR, Bont Z, Erb M. 2018.** Neighbourhood effects determine plant–  
480 herbivore interactions below-ground. *Journal of Ecology* **106**: 347–356.
- 481 **Insam H, Seewald MSA. 2010.** Volatile organic compounds (VOCs) in soils. *Biology and Fertility of*  
482 *Soils* **46**: 199–213.
- 483 **Jongsma M, Bakker P, Visser B, Stiekema W. 1994.** Trypsin inhibitor activity in mature tobacco and  
484 tomato plants is mainly induced locally in response to insect attack, wounding and virus infection.  
485 *Planta* **195**.
- 486 **Jung SC, Martinez-Medina A, Lopez-Raez JA, Pozo MJ. 2012.** Mycorrhiza-induced resistance and  
487 priming of plant defenses. *Journal of Chemical Ecology* **38**: 651–664.
- 488 **Karban R. 2011.** The ecology and evolution of induced resistance against herbivores. *Functional*  
489 *Ecology* **25**: 339–347.

- 490 **Kenji M. 2006.** Green leaf volatiles: hydroperoxide lyase pathway of oxylipin metabolism. *Current*  
491 *Opinion in Plant Biology* **9**: 274–280.
- 492 **Kessler A, Halitschke R, Diezel C, Baldwin IT. 2006.** Priming of plant defense responses in nature by  
493 airborne signaling between *Artemisia tridentata* and *Nicotiana attenuata*. *Oecologia* **148**: 280–292.
- 494 **Kim J, Quaghebeur H, Felton GW. 2011.** Reiterative and interruptive signaling in induced plant  
495 resistance to chewing insects. *Phytochemistry* **72**: 1624–1634.
- 496 **Kombrink E. 2012.** Chemical and genetic exploration of jasmonate biosynthesis and signaling paths.  
497 *Planta* **236**: 1351–1366.
- 498 **Kost C, Heil M. 2006.** Herbivore-induced plant volatiles induce an indirect defence in neighbouring  
499 plants. *Journal of Ecology* **94**: 619–628.
- 500 **Li B, Förster C, Robert CAM, Züst T, Hu L, Machado RAR, Berset J-D, Handrick V, Knauer T,**  
501 **Hensel G et al. 2018.** Convergent evolution of a metabolic switch between aphid and caterpillar  
502 resistance in cereals. *Science Advances* **4**: eaat6797.
- 503 **Ma Q, Zhang X, Qu Y. 2018.** Biodegradation and biotransformation of indole: Advances and  
504 perspectives. *Frontiers in Microbiology* **9**: 2625.
- 505 **Machado RAR, Ferrieri AP, Robert CAM, Glauser G, Kallenbach M, Baldwin IT, Erb M. 2013.**  
506 Leaf-herbivore attack reduces carbon reserves and regrowth from the roots via jasmonate and auxin  
507 signaling. *The New Phytologist* **200**: 1234–1246.
- 508 **Martinez-Medina A, Flors V, Heil M, Mauch-Mani B, Pieterse CMJ, Pozo MJ, Ton J, van Dam**  
509 **NM, Conrath U. 2016.** Recognizing plant defense priming. *Trends in Plant Science* **21**: 818–822.
- 510 **Matsui K, Kurishita S, Hisamitsu A, Kajiwara T. 2000.** A lipid-hydrolysing activity involved in  
511 hexenal formation. *Biochemical Society Transactions* **28**: 857.
- 512 **McConn M, Creelman RA, Bell E, Mullet JE, Browse J. 1997.** Jasmonate is essential for insect  
513 defense in Arabidopsis. *Proceedings of the National Academy of Sciences of the United States of*  
514 *America* **94**: 5473–5477.
- 515 **Misra G, Pavlostathis SG, Perdue EM, Araujo R. 1996.** Aerobic biodegradation of selected  
516 monoterpenes. *Applied Microbiology and Biotechnology* **45**: 831–838.
- 517 **Moataz MT, Katsuyuki TY, Takayuki K, Takao K, Kenji M. 2017.** n-Hexanal and (Z)-3-hexenal  
518 are generated from arachidonic acid and linolenic acid by a lipoxygenase in *Marchantia polymorpha*  
519 *L.* *Bioscience, Biotechnology, and Biochemistry* **81**: 1148–1155.
- 520 **Oleson JD, Park Y-L, Nowatzki TM, Tollefson JJ. 2005.** Node-injury scale to evaluate root injury by  
521 Corn Rootworms (Coleoptera: Chrysomelidae). *Journal of Economic Entomology* **98**: 1–8.
- 522 **Owen SM, Clark S, Pompe M, Semple KT. 2007.** Biogenic volatile organic compounds as potential  
523 carbon sources for microbial communities in soil from the rhizosphere of *Populus tremula*. *FEMS*  
524 *Microbiology Letters* **268**: 34–39.

- 525 **Peng H-P, Lin T-Y, Wang N-N, Shih M-C. 2005.** Differential expression of genes encoding 1-  
526 aminocyclopropane-1-carboxylate synthase in Arabidopsis during hypoxia. *Plant Molecular Biology*  
527 **58:** 15–25.
- 528 **Peñuelas J, Asensio D, Tholl D, Wenke K, Rosenkranz M, Piechulla B, Schnitzler JP. 2014.**  
529 Biogenic volatile emissions from the soil. *Plant, Cell & Environment* **37:** 1866–1891.
- 530 **Perry DA. 1995.** Self-organizing systems across scales. *Trends in Ecology & Evolution* **10:** 241–244.
- 531 **Perry LG, Alford ER, Horiuchi J, Paschke MW, Vivanco JM. 2007.** Chemical signals in the  
532 rhizosphere: root–root and root–microbe communication. In: *The Rhizosphere*. CRC Press, 310–343.
- 533 **Ramirez KS, Lauber CL, Fierer N. 2010.** Microbial consumption and production of volatile organic  
534 compounds at the soil-litter interface. *Biogeochemistry* **99:** 97–107.
- 535 **Rasmann S, Köllner TG, Degenhardt J, Hiltbold I, Toepfer S, Kuhlmann U, Gershenzon J,**  
536 **Turlings TCJ. 2005.** Recruitment of entomopathogenic nematodes by insect-damaged maize roots.  
537 *Nature* **434:** 732–737.
- 538 **Remy E, Cabrito TR, Batista RA, Teixeira MC, Sá-Correia I, Duque P. 2014.** The major facilitator  
539 superfamily transporter *zifl2* modulates cesium and potassium homeostasis in Arabidopsis. *Plant and*  
540 *Cell Physiology* **56:** 148–162.
- 541 **Riedlmeier M, Ghirardo A, Wenig M, Knappe C, Koch K, Georgii E, Dey S, Parker JE, Schnitzler**  
542 **J-P, Vlot AC. 2017.** Monoterpenes support systemic acquired resistance within and between plants.  
543 *Plant Cell* **29:** 1440–1459.
- 544 **Robert CAM, Erb M, Duployer M, Zwahlen C, Doyen GR, Turlings TCJ. 2012a.** Herbivore-  
545 induced plant volatiles mediate host selection by a root herbivore. *New Phytologist* **194:** 1061–1069.
- 546 **Robert CAM, Erb M, Hibbard BE, French BW, Zwahlen C, Turlings TCJ. 2012b.** A specialist root  
547 herbivore reduces plant resistance and uses an induced plant volatile to aggregate in a density-  
548 dependent manner. *Functional Ecology* **26:** 1429–1440.
- 549 **Rodriguez-Saona CR, Mescher MC, Moraes CM de. 2013.** The role of volatiles in plant–plant  
550 interactions. In: Baluška F, ed. *Long-Distance Systemic Signaling and Communication in Plants*.  
551 Berlin, Heidelberg: Springer Berlin Heidelberg, 393–412.
- 552 **Rodriguez-Saona CR, Rodriguez-Saona LE, Frost CJ. 2009.** Herbivore-induced volatiles in the  
553 perennial shrub, *Vaccinium corymbosum*, and their role in inter-branch signaling. *Journal of*  
554 *Chemical Ecology* **35:** 163–175.
- 555 **Ruther J, Fürstenau B. 2005.** Emission of herbivore-induced volatiles in absence of a herbivore -  
556 Response of *Zea mays* to green leaf volatiles and terpenoids. *Zeitschrift für Naturforschung C* **60:**  
557 743–756.
- 558 **Schaller GE. 2012.** Ethylene and the regulation of plant development. *BMC Biology* **10:** 9.
- 559 **Schenkel D, Lemfack MC, Piechulla B, Splivallo R. 2015.** A meta-analysis approach for assessing  
560 the diversity and specificity of belowground root and microbial volatiles. *Frontiers in Plant Science*  
561 **6:** 707.



- 562 **Selosse M-A, Richard F, He X, Simard SW. 2006.** Mycorrhizal networks: « Des liaisons  
563 dangereuses »? *Trends in Ecology & Evolution* **21**: 621–628.
- 564 **Seo J-S, Keum Y-S, Li QX. 2009.** Bacterial degradation of aromatic compounds. *International Journal*  
565 *of Environmental Research and Public Health* **6**: 278–309.
- 566 **Shahzad T, Chenu C, Genet P, Barot S, Perveen N, Mouglin C, Fontaine S. 2015.** Contribution of  
567 exudates, arbuscular mycorrhizal fungi and litter depositions to the rhizosphere priming effect  
568 induced by grassland species. *Soil Biology and Biochemistry* **80**: 146–155.
- 569 **Shiferaw B, Prasanna BM, Hellin J, Bänziger M. 2011.** Crops that feed the world 6. Past successes  
570 and future challenges to the role played by maize in global food security. *Food Security* **3**: 307.
- 571 **Skoczek A, Piesik D, Wenda-Piesik A, Buszewski B, Bocianowski J, Wawrzyniak M. 2017.** Volatile  
572 organic compounds released by maize following herbivory or insect extract application and  
573 communication between plants. *Journal of Applied Entomology* **141**: 630–643.
- 574 **Smith AM, Zeeman SC. 2006.** Quantification of starch in plant tissues. *Nature Protocols* **1**: 1342–  
575 1345.
- 576 **Song Y, Wang M, Zeng R, Groten K, Baldwin IT. 2019.** Priming and filtering of antiherbivore  
577 defences among *Nicotiana attenuata* plants connected by mycorrhizal networks. *Plant, Cell &*  
578 *Environment* **42**: 2945–2961.
- 579 **Song YY, Ye M, Li CY, Wang RL, Wei XC, Luo SM, Zeng RS. 2013.** Priming of anti-herbivore  
580 defense in tomato by arbuscular mycorrhizal fungus and involvement of the jasmonate pathway.  
581 *Journal of Chemical Ecology* **39**: 1036–1044.
- 582 **Staswick PE, Su W, Howell SH. 1992.** Methyl jasmonate inhibition of root growth and induction of a  
583 leaf protein are decreased in an *Arabidopsis thaliana* mutant. *Proceedings of the National Academy*  
584 *of Sciences of the United States of America* **89**: 6837–6840.
- 585 **Tinsley NA, Mitchell PD, Wright RJ, Meinke LJ, Estes RE, Gray ME. 2016.** Estimation of efficacy  
586 functions for products used to manage corn rootworm larval injury. *Journal of Applied Entomology*  
587 **140**: 414–425.
- 588 **Ton J, D’Alessandro M, Jourdie V, Jakab G, Karlen D, Held M, Mauch-Mani B, Turlings TCJ.**  
589 **2007.** Priming by airborne signals boosts direct and indirect resistance in maize. *The Plant Journal*  
590 **49**: 16–26.
- 591 **Ton J, D’Alessandro M, Jourdie V, Jakab G, Karlen D, Held M, Mauch-Mani B, Turlings TCJ.**  
592 **2006.** Priming by airborne signals boosts direct and indirect resistance in maize. *The Plant Journal*  
593 *for Cell and Molecular Biology* **49**: 16–26.
- 594 **Tugizimana F, Mhlongo MI, Piater LA, Dubery IA. 2018.** Metabolomics in plant priming research:  
595 The way forward? *International Journal of Molecular Sciences* **19**: 1759.
- 596 **Turlings TCJ, Erb M. 2018.** Tritrophic interactions mediated by herbivore-induced plant volatiles:  
597 Mechanisms, ecological relevance, and application potential. *Annual Review of Entomology* **63**: 433–  
598 452.

- 599 **van der Heijden MGA, Horton TR. 2009.** Socialism in soil? The importance of mycorrhizal fungal  
600 networks for facilitation in natural ecosystems. *Journal of Ecology* **97**: 1139–1150.
- 601 **Velterop JS, Vos F. 2001.** A rapid and inexpensive microplate assay for the enzymatic determination  
602 of glucose, fructose, sucrose, L-malate and citrate in tomato (*Lycopersicon esculentum*) extracts and  
603 in orange juice. *Phytochemical Analysis* **12**: 299–304.
- 604 **Wenke K, Kai M, Piechulla B. 2010.** Belowground volatiles facilitate interactions between plant roots  
605 and soil organisms. *Planta* **231**: 499–506.
- 606 **Xavier CM, Campos-Herrere R, Jaffuel G, Roder G, Ted C.J. Turlings. 2017.** Diffusion of the  
607 maize root signal (*E*)- $\beta$ -caryophyllene in soils of different textures and the effects on the migration of  
608 the entomopathogenic nematode *Heterorhabditis megidis*. *Rhizosphere* **3**: 53–59.
- 609 **Ye M, Glauser G, Lou Y, Erb M, Hu L. 2019.** Molecular dissection of early defense signaling  
610 underlying volatile-mediated defense regulation and herbivore resistance in rice. *Plant Cell* **31**: 687–  
611 698.
- 612 **Zeringue HJ. 1987.** Changes in cotton leaf chemistry induced by volatile elicitors. *Phytochemistry* **26**:  
613 1357–1360.
- 614 **Zeringue HJ. 1992.** Effects of C6 - C10 alkenals and alkanals on eliciting a defence response in the  
615 developing cotton boll. *Phytochemistry* **31**: 2305–2308.
- 616 **Zhang P-J, Wei J-N, Zhao C, Zhang Y-F, Li C-Y, Liu S-S, Dicke M, Yu X-P, Turlings TCJ. 2019.**  
617 Airborne host-plant manipulation by whiteflies via an inducible blend of plant volatiles. *Proceedings*  
618 *of the National Academy of Sciences of the United States of America* **116**: 7387–7396.



619 **Supplementary Information**

620 **Figure S1. The root herbivore *Diabrotica balteata* migrate away from infested plants.** Proportion  
621 of larvae escaping from the maize plant after infestation (Mean  $\pm$  se, One sample t-test, n=6). Stars  
622 indicate significant differences (\*:  $p \leq 0.05$ , \*\*:  $p \leq 0.01$ ; \*\*\*:  $p \leq 0.001$ ).

623 **Figure S2. Exposure to HIPVs from through infested neighbors does not alter plant defense to**  
624 **herbivory. (a)** Relative larval weight gain (Mean  $\pm$  se, Student's t-tests) of the root herbivore  
625 *Diabrotica balteata* feeding for four days on maize (n=9) previously exposed for four days to  
626 control plants (control, green) or to plants infested with six *D. balteata* larvae (HIPVs, orange).  
627 **(b)** Proportions (Mean  $\pm$  se, Student's t-tests, n=9) of *D. balteata* recovered after 4 days infested  
628 on maize previously exposed for four days to control plants (control, green) or to plants infested  
629 with six *D. balteata* larvae (HIPVs, orange). **(c)** Root fresh mass after four days exposure to  
630 control (green) or to plants infested with six *D. balteata* larvae (HIPVs, orange) and then  
631 infested for four days by the root herbivore *D. balteata* (Mean  $\pm$  se, Student's t-tests, n=9).

632 **Table S1. Primer list for q-RT-PCR used to assess the plant response in this study** (Peng *et al.*, 2005; Ton  
633 *et al.*, 2007; Gao *et al.*, 2008; Erb *et al.*, 2009; Robert *et al.*, 2012b; Remy *et al.*, 2014; Hajiahmadi *et al.*, 2017);  
634 *NCBI Gene: 100193700\**).
